# Supplementary material for: Fe 3+ ∕ΣFe variation in lawsonite and epidote in subducted oceanic crust
Source: Copernicus journal article supplement (doi:10.5194/ejm-37-143-2025), 2025-03-07

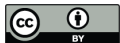

*Supplement of*

## **Fe<sup>3+</sup> / $\Sigma$ Fe variation in lawsonite and epidote in subducted oceanic crust**

**Donna L. Whitney et al.**

*Correspondence to:* Donna L. Whitney ([dwhitney@umn.edu](mailto:dwhitney@umn.edu))

The copyright of individual parts of the supplement might differ from the article licence.

## Supplementary material

### 1. XANES analytical procedures and modeling

XANES analyses were acquired with two Silicon (311) monochromator crystals that provide an energy resolution of  $\Delta E/E = 2.8 \times 10^{-5}$ . At 7000 eV, this corresponds to an energy resolution of 0.196 eV. Each scan was ~10 minutes in duration, with 1 second/point acquisition. The original, non-averaged data are provided in Table S1.

After normalization of the XANES spectrum, several eV below and above the pre-edge were used to model the background by the main edge to this region. This was done using the limb of a Lorentzian. This function was subtracted from the normalized spectrum, yielding the pre-edge (Fig. 1b). The background subtracted spectrum was directly used to numerically determine the centroid energy and intensity. No peaks were fitted to the pre-edge itself. This procedure was first used by Wilke et al. (2009) and yielded reliable results. It avoids fits with many parameters and a choice of line form for the pre-edge peaks. We used scripts programmed in Igor Pro for processing.

Regarding uncertainties:  $Fe^{3+}/Fe > Fe$  is a result of orientation effects that skew the relation between the centroid and oxidation state. The calibration assumes that all electronic transitions are excited equally, as in a randomly oriented powder. The linear dichroism breaks this assumption by exciting some transitions preferentially at a given crystal orientation. This leads to overestimation or underestimation of the “normal” centroid value. Calculation of the oxidation state may (for example) result in values between 0.8 and 1.2 for a true value of 1.0 (e.g., in the case of epidote). For the other minerals measured in this study, the effect is smaller to negligible, as discussed in the text.

The uncertainties provided are estimated based on the reproducibility of the analysis of the centroid. The uncertainty in centroid energy has been propagated to oxidation state using the polynomial with the uncertainty of the parameters given. Uncertainties are standard deviations. The estimated uncertainties are within the energy resolution provided from the beamline setting.

**Table S1:** XANES data (ESRF, BM23, April 2023)

| reference materials | centroid | intensity | calibrations                 |                              |
|---------------------|----------|-----------|------------------------------|------------------------------|
|                     |          |           | old<br>Fe <sup>3+</sup> /ΣFe | new<br>Fe <sup>3+</sup> /ΣFe |
| olivine_scan3       | 7111.96  | 0.0695    | -0.02                        | <b>-0.01</b>                 |
| olivine_scan6       | 7112.01  | 0.0704    | 0.00                         | <b>0.01</b>                  |
| olivine_scan6       | 7112.00  | 0.0710    | 0.00                         | <b>0.00</b>                  |
| olivine_scan9       | 7111.99  | 0.0714    | -0.01                        | <b>0.00</b>                  |
| olivine_scan12      | 7112.00  | 0.0698    | 0.00                         | <b>0.00</b>                  |
| acmite_scan17       | 7113.65  | 0.0763    | 1.19                         | <b>1.04</b>                  |

|                              |         |        |       |              |
|------------------------------|---------|--------|-------|--------------|
| acmite_scan17                | 7113.64 | 0.0809 | 1.17  | <b>1.03</b>  |
| acmite_1_scan17              | 7113.66 | 0.0759 | 1.20  | <b>1.05</b>  |
| acmite_2_scan3               | 7113.80 | 0.0924 | 1.42  | <b>1.16</b>  |
| andradite_scan3              | 7113.61 | 0.0668 | 1.14  | <b>1.00</b>  |
| siderite_scan3               | 7112.00 | 0.0958 | 0.00  | <b>0.00</b>  |
| sancarlos_scan3              | 7111.95 | 0.0601 | -0.03 | <b>-0.02</b> |
| pjo92190_scan7               | 7112.98 | 0.0818 | 0.57  | <b>0.54</b>  |
| pjo92190_scan10              | 7112.95 | 0.0808 | 0.55  | <b>0.52</b>  |
| pjo92190_scan13              | 7112.90 | 0.0793 | 0.52  | <b>0.49</b>  |
| pjo92190_scan16              | 7113.00 | 0.0804 | 0.59  | <b>0.55</b>  |
| pjo92190_scan22              | 7112.82 | 0.0683 | 0.47  | <b>0.44</b>  |
| pjo92190_scan25              | 7112.88 | 0.0679 | 0.50  | <b>0.48</b>  |
| NC18_08A_alm_Saggrenda_scan4 | 7112.04 | 0.0761 | 0.02  | <b>0.02</b>  |
| NC18_08A_alm_Saggrenda_scan7 | 7112.04 | 0.0778 | 0.02  | <b>0.02</b>  |

**lawsonite grain mount (Franciscan/ UMN)**

|                     |         |        |      |             |
|---------------------|---------|--------|------|-------------|
| UMNlws_xtal3_scan3  | 7113.65 | 0.0606 | 1.19 | <b>1.04</b> |
| UMNlws_xtal3_scan10 | 7113.66 | 0.0623 | 1.21 | <b>1.05</b> |
| UMNlws_xtal3_scan13 | 7113.76 | 0.0643 | 1.35 | <b>1.13</b> |
| UMNlws_xtal3_scan16 | 7113.69 | 0.0600 | 1.24 | <b>1.07</b> |
| UMNlws_xtal3_scan19 | 7113.66 | 0.0624 | 1.20 | <b>1.05</b> |
| UMNlws_xtal3_scan22 | 7113.76 | 0.0592 | 1.36 | <b>1.13</b> |
| UMNlws_xtal3_scan25 | 7113.60 | 0.0652 | 1.13 | <b>1.00</b> |
| UMNlws_xtal3_scan28 | 7113.64 | 0.0616 | 1.17 | <b>1.03</b> |
| UMNlws_xtal3_scan31 | 7113.60 | 0.0645 | 1.13 | <b>1.00</b> |
| UMNlws_xtal3_scan34 | 7113.59 | 0.0666 | 1.11 | <b>0.99</b> |
| UMNlws_xtal3_scan37 | 7113.65 | 0.0639 | 1.19 | <b>1.04</b> |
| UMNlws_xtal3_scan40 | 7113.65 | 0.0604 | 1.20 | <b>1.04</b> |
| UMNlws_xtal3_scan43 | 7113.67 | 0.0620 | 1.21 | <b>1.05</b> |
| UMNlws_xtal3_scan46 | 7113.65 | 0.0595 | 1.20 | <b>1.04</b> |
| UMNlws_xtal2_scan49 | 7113.54 | 0.0667 | 1.05 | <b>0.95</b> |
| UMNlws_xtal2_scan52 | 7113.66 | 0.0641 | 1.20 | <b>1.05</b> |
| UMNlws_xtal2_scan55 | 7113.70 | 0.0650 | 1.25 | <b>1.08</b> |
| UMNlws_xtal2_scan58 | 7113.63 | 0.0600 | 1.17 | <b>1.02</b> |
| UMNlws_xtal2_scan61 | 7113.65 | 0.0616 | 1.18 | <b>1.04</b> |
| UMNlws_xtal2_scan64 | 7113.68 | 0.0616 | 1.23 | <b>1.06</b> |
| UMNlws_xtal2_scan67 | 7113.68 | 0.0611 | 1.23 | <b>1.06</b> |
| UMNlws_xtal2_scan70 | 7113.65 | 0.0612 | 1.19 | <b>1.04</b> |
| UMNlws_xtal2_scan73 | 7113.68 | 0.0628 | 1.23 | <b>1.06</b> |
| UMNlws_xtal2_scan76 | 7113.66 | 0.0588 | 1.20 | <b>1.05</b> |
| UMNlws_xtal2_scan79 | 7113.73 | 0.0611 | 1.30 | <b>1.10</b> |
| UMNlws_xtal2_scan82 | 7113.75 | 0.0593 | 1.33 | <b>1.12</b> |
| UMNlws_xtal2_scan85 | 7113.66 | 0.0628 | 1.21 | <b>1.05</b> |
| UMNlws_xtal2_scan88 | 7113.77 | 0.0607 | 1.37 | <b>1.14</b> |
| UMNlws_xtal2_scan91 | 7113.68 | 0.0596 | 1.23 | <b>1.06</b> |
| UMNlws_xtal2_scan94 | 7113.68 | 0.0587 | 1.23 | <b>1.06</b> |
| UMNlws_xtal2_scan97 | 7113.69 | 0.0635 | 1.24 | <b>1.07</b> |

|                      |         |        |      |             |
|----------------------|---------|--------|------|-------------|
| UMNlws_xtal2_scan100 | 7113.62 | 0.0611 | 1.16 | <b>1.01</b> |
| UMNlws_xtal2_scan103 | 7113.71 | 0.0610 | 1.28 | <b>1.09</b> |
| UMNlws_xtal2_scan106 | 7113.69 | 0.0625 | 1.24 | <b>1.07</b> |
| UMNlws_xtal2_scan109 | 7113.72 | 0.0613 | 1.29 | <b>1.10</b> |
| UMNlws_xtal2_scan112 | 7113.75 | 0.0586 | 1.33 | <b>1.12</b> |

**lawsonite in eclogite thin section (Sivrihisar, Turkey); not shown: garnet data**

|                   |         |        |      |             |
|-------------------|---------|--------|------|-------------|
| SV12_13D1_scan3   | 7113.80 | 0.0538 | 1.42 | <b>1.16</b> |
| SV12_13D1_scan6   | 7113.80 | 0.0568 | 1.42 | <b>1.16</b> |
| SV12_13D1_scan16  | 7113.30 | 0.0612 | 0.82 | <b>0.76</b> |
| SV12_13D1_scan19  | 7113.75 | 0.0610 | 1.33 | <b>1.12</b> |
| SV12_13D1_scan22  | 7113.73 | 0.0569 | 1.30 | <b>1.10</b> |
| SV12_13D1_scan36  | 7113.68 | 0.0686 | 1.24 | <b>1.06</b> |
| SV12_13D1_scan39  | 7113.32 | 0.0570 | 0.84 | <b>0.78</b> |
| SV12_13D1_scan42  | 7113.38 | 0.0601 | 0.89 | <b>0.82</b> |
| SV12_13D1_scan46  | 7113.58 | 0.0600 | 1.11 | <b>0.98</b> |
| SV12_13D1_scan49  | 7113.56 | 0.0638 | 1.08 | <b>0.96</b> |
| SV12_13D1_scan52  | 7113.56 | 0.0687 | 1.08 | <b>0.96</b> |
| SV12_13D1_scan55  | 7113.54 | 0.0645 | 1.05 | <b>0.95</b> |
| SV12_13D1_scan69  | 7113.61 | 0.0602 | 1.13 | <b>1.00</b> |
| SV12_13D1_scan72  | 7113.59 | 0.0627 | 1.12 | <b>0.99</b> |
| SV12_13D1_scan75  | 7113.68 | 0.0573 | 1.23 | <b>1.06</b> |
| SV12_13D1_scan78  | 7113.68 | 0.0604 | 1.23 | <b>1.06</b> |
| SV12_13D1_scan81  | 7113.65 | 0.0587 | 1.19 | <b>1.04</b> |
| SV12_13D1_scan84  | 7113.55 | 0.0630 | 1.07 | <b>0.96</b> |
| SV12_13D1_scan87  | 7113.57 | 0.0695 | 1.09 | <b>0.97</b> |
| SV12_13D1_scan90  | 7113.61 | 0.0619 | 1.13 | <b>1.00</b> |
| SV12_13D1_scan93  | 7113.54 | 0.0680 | 1.06 | <b>0.95</b> |
| SV12_13D1_scan96  | 7113.60 | 0.0662 | 1.12 | <b>1.00</b> |
| SV12_13D1_scan99  | 7113.56 | 0.0629 | 1.08 | <b>0.96</b> |
| SV12_13D1_scan102 | 7113.60 | 0.0631 | 1.13 | <b>1.00</b> |
| SV12_13D1_scan105 | 7113.61 | 0.0640 | 1.14 | <b>1.00</b> |
| SV12_13D1_scan108 | 7113.46 | 0.0718 | 0.97 | <b>0.89</b> |
| SV12_13D1_scan111 | 7113.53 | 0.0643 | 1.05 | <b>0.94</b> |
| SV12_13D1_scan114 | 7113.51 | 0.0663 | 1.03 | <b>0.92</b> |
| SV12_13D1_scan117 | 7113.51 | 0.0646 | 1.03 | <b>0.92</b> |
| SV12_13D1_scan120 | 7113.45 | 0.0650 | 0.97 | <b>0.88</b> |
| SV12_13D1_scan150 | 7113.35 | 0.0651 | 0.87 | <b>0.80</b> |
| SV12_13D1_scan153 | 7113.39 | 0.0563 | 0.91 | <b>0.83</b> |
| SV12_13D1_scan156 | 7113.44 | 0.0593 | 0.95 | <b>0.87</b> |
| SV12_13D1_scan159 | 7113.44 | 0.0628 | 0.95 | <b>0.87</b> |
| SV12_13D1_scan162 | 7113.40 | 0.0625 | 0.91 | <b>0.84</b> |
| SV12_13D1_scan177 | 7113.42 | 0.0836 | 0.93 | <b>0.85</b> |
| SV12_13D1_scan180 | 7113.50 | 0.0679 | 1.01 | <b>0.92</b> |
| SV12_13D1_scan183 | 7113.45 | 0.0652 | 0.96 | <b>0.88</b> |

|                   |         |        |      |             |
|-------------------|---------|--------|------|-------------|
| SV12_13D1_scan186 | 7113.48 | 0.0685 | 0.99 | <b>0.90</b> |
| SV12_13D1_scan189 | 7113.56 | 0.0650 | 1.08 | <b>0.96</b> |

**lawsonite in blueschist thin sections (New Caledonia)**

|                 |         |        |      |             |      |
|-----------------|---------|--------|------|-------------|------|
| NC19_159_scan6  | 7112.84 | 0.0681 | 0.48 | <b>0.45</b> | rim  |
| NC19_159_scan9  | 7112.91 | 0.0882 | 0.52 | <b>0.49</b> | rim  |
| NC19_159_scan12 | 7112.99 | 0.0637 | 0.58 | <b>0.55</b> | core |
| NC19_159_scan15 | 7113.21 | 0.0669 | 0.75 | <b>0.70</b> | rim  |
| NC19_159_scan18 | 7113.14 | 0.0692 | 0.69 | <b>0.65</b> | core |
| NC19_159_scan21 | 7113.02 | 0.0561 | 0.60 | <b>0.57</b> | core |
| NC19_159_scan24 | 7112.93 | 0.0707 | 0.54 | <b>0.51</b> | rim  |
| NC19_159_scan27 | 7113.02 | 0.0647 | 0.60 | <b>0.57</b> | rim  |
| NC19_159_scan30 | 7113.04 | 0.0654 | 0.62 | <b>0.58</b> | rim  |
| NC19_159_scan35 | 7113.16 | 0.0617 | 0.70 | <b>0.66</b> | core |
| NC19_159_scan38 | 7113.18 | 0.0601 | 0.73 | <b>0.68</b> | core |
| NC19_159_scan41 | 7113.09 | 0.0582 | 0.65 | <b>0.61</b> | core |
| NC19_159_scan44 | 7113.17 | 0.0630 | 0.71 | <b>0.67</b> | rim  |
| NC19_159_scan48 | 7112.98 | 0.0620 | 0.57 | <b>0.54</b> | rim  |
| NC19_159_scan53 | 7112.54 | 0.0603 | 0.29 | <b>0.27</b> | core |
| NC19_159_scan56 | 7112.82 | 0.0593 | 0.47 | <b>0.44</b> |      |
| NC19_159_scan59 | 7113.02 | 0.0683 | 0.60 | <b>0.57</b> | rim  |

*note: scans 12, 18, 21 = same pt; scans 15, 24, 27, 30 = same pt*

|                       |         |        |      |             |      |
|-----------------------|---------|--------|------|-------------|------|
| NC18_01_xtal1_scan4   | 7112.86 | 0.0550 | 0.49 | <b>0.46</b> |      |
| NC18_02_xtal1_scan17  | 7113.01 | 0.0620 | 0.59 | <b>0.56</b> |      |
| NC18_01_xtal2_scan20  | 7112.96 | 0.0634 | 0.56 | <b>0.53</b> |      |
| NC18_01_xtal2_scan23  | 7113.02 | 0.0669 | 0.60 | <b>0.57</b> | rim  |
| NC18_01_xtal2_scan26  | 7113.07 | 0.0605 | 0.64 | <b>0.60</b> |      |
| NC18_01_xtal3_scan29  | 7113.26 | 0.0687 | 0.79 | <b>0.74</b> | rim  |
| NC18_01_xtal3_scan32  | 7113.19 | 0.0609 | 0.73 | <b>0.68</b> |      |
| NC18_01_xtal4_scan53  | 7112.70 | 0.0583 | 0.39 | <b>0.36</b> | rim  |
| NC18_01_xtal4_scan56  | 7112.69 | 0.0640 | 0.38 | <b>0.36</b> |      |
| NC18_01_xtal5_scan59  | 7112.85 | 0.0615 | 0.49 | <b>0.46</b> | core |
| NC18_01_xtal5_scan62  | 7112.74 | 0.0540 | 0.42 | <b>0.39</b> |      |
| NC18_01_xtal5_scan65  | 7113.00 | 0.0582 | 0.59 | <b>0.55</b> | rim  |
| NC18_01_xtal5_scan68  | 7112.92 | 0.0609 | 0.53 | <b>0.50</b> |      |
| NC18_01_xtal6_scan71  | 7112.68 | 0.0492 | 0.38 | <b>0.35</b> | rim  |
| NC18_01_xtal6_scan74  | 7112.45 | 0.0470 | 0.24 | <b>0.22</b> |      |
| NC18_01_xtal6_scan77  | 7112.99 | 0.0642 | 0.58 | <b>0.55</b> | mid  |
| NC18_01_xtal6_scan80  | 7112.98 | 0.0651 | 0.58 | <b>0.54</b> |      |
| NC18_01_xtal6_scan83  | 7112.81 | 0.0641 | 0.46 | <b>0.43</b> | core |
| NC18_01_xtal6_scan86  | 7112.85 | 0.0600 | 0.49 | <b>0.46</b> |      |
| NC18_01_xtal7_scan89  | 7112.94 | 0.0689 | 0.54 | <b>0.51</b> | rim  |
| NC18_01_xtal7_scan92  | 7113.03 | 0.0628 | 0.61 | <b>0.57</b> |      |
| NC18_01_xtal7_scan95  | 7112.96 | 0.0582 | 0.56 | <b>0.53</b> | mid  |
| NC18_01_xtal7_scan98  | 7113.03 | 0.0605 | 0.61 | <b>0.57</b> |      |
| NC18_01_xtal7_scan101 | 7112.71 | 0.0555 | 0.39 | <b>0.37</b> | core |

|                       |         |        |      |             |
|-----------------------|---------|--------|------|-------------|
| NC18_01_xtal7_scan104 | 7112.71 | 0.0606 | 0.40 | <b>0.37</b> |
|-----------------------|---------|--------|------|-------------|

**epidote grain mount (Bayreuth)**

|                   |         |        |      |             |
|-------------------|---------|--------|------|-------------|
| epidote_bt_scan6  | 7113.82 | 0.0897 | 1.46 | <b>1.18</b> |
| epidote_bt_scan9  | 7113.80 | 0.0893 | 1.43 | <b>1.16</b> |
| epidote_bt_scan12 | 7113.81 | 0.0881 | 1.45 | <b>1.17</b> |
| epidote_bt_scan16 | 7113.57 | 0.0942 | 1.10 | <b>0.97</b> |
| epidote_bt_scan19 | 7113.57 | 0.0881 | 1.09 | <b>0.97</b> |
| epidote_bt_scan23 | 7113.60 | 0.0715 | 1.12 | <b>1.00</b> |
| epidote_bt_scan26 | 7113.58 | 0.0738 | 1.11 | <b>0.98</b> |

**clinozoisite grain mount (Gilgit, Pakistan)**

|                     |         |        |      |             |
|---------------------|---------|--------|------|-------------|
| clz_pakistan_scan9  | 7113.93 | 0.0796 | 1.88 | <b>1.28</b> |
| clz_pakistan_scan12 | 7113.92 | 0.0851 | 1.77 | <b>1.27</b> |
| clz_pakistan_scan20 | 7113.51 | 0.0909 | 1.03 | <b>0.92</b> |
| clz_pakistan_scan23 | 7113.49 | 0.0887 | 1.00 | <b>0.91</b> |
| clz_pakistan_scan27 | 7113.71 | 0.1134 | 1.28 | <b>1.09</b> |
| clz_pakistan_scan30 | 7113.68 | 0.1141 | 1.24 | <b>1.06</b> |

**EGMs in blueschist/eclogite thin sections (New Caledonia)**

|                |         |        |      |             |
|----------------|---------|--------|------|-------------|
| NC19_43_scan5  | 7113.55 | 0.0803 | 1.07 | <b>0.96</b> |
| NC19_43_scan11 | 7113.54 | 0.0790 | 1.06 | <b>0.95</b> |
| NC19_43_scan18 | 7113.57 | 0.0802 | 1.09 | <b>0.97</b> |
| NC19_43_scan21 | 7113.59 | 0.0798 | 1.12 | <b>0.99</b> |
| NC19_43_scan24 | 7113.07 | 0.0744 | 0.64 | <b>0.60</b> |
| NC19_43_scan27 | 7113.10 | 0.0743 | 0.66 | <b>0.62</b> |
| NC19_43_scan30 | 7113.13 | 0.0725 | 0.68 | <b>0.64</b> |
| NC19_43_scan33 | 7113.13 | 0.0749 | 0.68 | <b>0.64</b> |
| NC19_43_scan36 | 7113.63 | 0.0849 | 1.16 | <b>1.02</b> |
| NC19_43_scan39 | 7113.58 | 0.0856 | 1.10 | <b>0.98</b> |
| NC19_43_scan43 | 7113.53 | 0.0988 | 1.04 | <b>0.94</b> |
| NC19_43_scan46 | 7113.52 | 0.0977 | 1.03 | <b>0.93</b> |
| NC19_43_scan51 | 7113.44 | 0.0836 | 0.95 | <b>0.87</b> |
| NC19_43_scan54 | 7113.46 | 0.0805 | 0.98 | <b>0.89</b> |
| NC19_43_scan70 | 7113.35 | 0.0750 | 0.86 | <b>0.80</b> |
| NC19_43_scan73 | 7113.32 | 0.0770 | 0.84 | <b>0.78</b> |

|                 |         |        |      |             |
|-----------------|---------|--------|------|-------------|
| NC18_30B_scan9  | 7113.69 | 0.1012 | 1.25 | <b>1.07</b> |
| NC18_30B_scan12 | 7113.69 | 0.1105 | 1.25 | <b>1.07</b> |
| NC18_30B_scan15 | 7113.75 | 0.0710 | 1.33 | <b>1.12</b> |
| NC18_30B_scan18 | 7113.75 | 0.0722 | 1.34 | <b>1.12</b> |
| NC18_30B_scan21 | 7113.75 | 0.0829 | 1.34 | <b>1.12</b> |
| NC18_30B_scan24 | 7113.73 | 0.0822 | 1.30 | <b>1.10</b> |
| NC18_30B_scan27 | 7113.72 | 0.0783 | 1.28 | <b>1.10</b> |
| NC18_30B_scan30 | 7113.75 | 0.0775 | 1.33 | <b>1.12</b> |
| NC18_30B_scan33 | 7113.58 | 0.1094 | 1.10 | <b>0.98</b> |
| NC18_30B_scan36 | 7113.58 | 0.1101 | 1.10 | <b>0.98</b> |

|                   |         |        |      |             |
|-------------------|---------|--------|------|-------------|
| NC18_30B_scan57   | 7113.45 | 0.1179 | 0.96 | <b>0.88</b> |
| NC18_08A_scan4    | 7113.49 | 0.0916 | 1.01 | <b>0.91</b> |
| NC18_08A_scan7    | 7113.50 | 0.0958 | 1.02 | <b>0.92</b> |
| NC18_08A_scan10   | 7113.44 | 0.1099 | 0.95 | <b>0.87</b> |
| NC18_08A_scan13   | 7113.42 | 0.1095 | 0.93 | <b>0.85</b> |
| NC18_08A_scan16   | 7113.46 | 0.1088 | 0.97 | <b>0.89</b> |
| NC18_08A_scan19   | 7113.46 | 0.1084 | 0.98 | <b>0.89</b> |
| NC18_08A_scan22   | 7113.51 | 0.1099 | 1.02 | <b>0.92</b> |
| NC18_08A_scan25   | 7113.49 | 0.1099 | 1.00 | <b>0.91</b> |
| NC18_08A_scan28   | 7113.51 | 0.1124 | 1.02 | <b>0.92</b> |
| NC18_08A_scan31   | 7113.50 | 0.1118 | 1.01 | <b>0.92</b> |
| NC18_08A_scan34   | 7113.41 | 0.1160 | 0.92 | <b>0.85</b> |
| NC18_08A_scan37   | 7113.41 | 0.1142 | 0.93 | <b>0.85</b> |
| NC18_08A_scan40   | 7113.70 | 0.0785 | 1.26 | <b>1.08</b> |
| NC18_08A_scan43   | 7113.71 | 0.0757 | 1.28 | <b>1.09</b> |
| NC18_08A_scan46   | 7113.73 | 0.0799 | 1.31 | <b>1.10</b> |
| NC18_08A_scan49   | 7113.75 | 0.0765 | 1.33 | <b>1.12</b> |
| NC18_08A_scan52   | 7113.62 | 0.0839 | 1.15 | <b>1.01</b> |
| NC18_08A_scan55   | 7113.61 | 0.0855 | 1.14 | <b>1.00</b> |
| NC18_08A_scan58   | 7113.61 | 0.0891 | 1.13 | <b>1.00</b> |
| NC18_08A_scan61   | 7113.63 | 0.0861 | 1.16 | <b>1.02</b> |
| NC18_08A_scan64   | 7113.38 | 0.0855 | 0.90 | <b>0.82</b> |
| NC18_08A_scan67   | 7113.39 | 0.0850 | 0.91 | <b>0.83</b> |
| NC18_08A_2_scan3  | 7113.39 | 0.0959 | 0.90 | <b>0.83</b> |
| NC18_08A_2_scan6  | 7113.39 | 0.0943 | 0.90 | <b>0.83</b> |
| NC18_08A_2_scan9  | 7113.37 | 0.1157 | 0.89 | <b>0.82</b> |
| NC18_08A_2_scan12 | 7113.37 | 0.1140 | 0.88 | <b>0.82</b> |

**lawsonite grain mount (Franciscan / Smithsonian)**

|                              |         |        |      |             |
|------------------------------|---------|--------|------|-------------|
| Lws_smithsonian_xtal1_scan3  | 7113.57 | 0.0609 | 1.09 | <b>0.97</b> |
| Lws_smithsonian_xtal1_scan6  | 7113.63 | 0.0643 | 1.17 | <b>1.02</b> |
| Lws_smithsonian_xtal1_scan9  | 7113.58 | 0.0610 | 1.11 | <b>0.98</b> |
| Lws_smithsonian_xtal1_scan12 | 7113.69 | 0.0578 | 1.25 | <b>1.07</b> |
| Lws_smithsonian_xtal2_scan3  | 7113.53 | 0.0584 | 1.05 | <b>0.94</b> |
| Lws_smithsonian_xtal2_scan6  | 7113.52 | 0.0570 | 1.03 | <b>0.93</b> |
| Lws_smithsonian_xtal2_scan9  | 7113.57 | 0.0571 | 1.09 | <b>0.97</b> |
| Lws_smithsonian_xtal2_scan12 | 7113.54 | 0.0566 | 1.06 | <b>0.95</b> |
| Lws_smithsonian_xtal3_scan3  | 7113.52 | 0.0551 | 1.03 | <b>0.93</b> |
| Lws_smithsonian_xtal3_scan6  | 7113.46 | 0.0564 | 0.97 | <b>0.89</b> |
| Lws_smithsonian_xtal3_scan9  | 7113.50 | 0.0547 | 1.01 | <b>0.92</b> |
| Lws_smithsonian_xtal3_scan12 | 7113.49 | 0.0547 | 1.00 | <b>0.91</b> |

**zoisite grain mount (loc. unknown / UMN)**

|                    |         |        |      |             |
|--------------------|---------|--------|------|-------------|
| UMN_Zo_xtal1_scan3 | 7113.34 | 0.0662 | 0.86 | <b>0.79</b> |
| UMN_Zo_xtal1_scan6 | 7113.31 | 0.0666 | 0.83 | <b>0.77</b> |

|                    |         |        |      |             |
|--------------------|---------|--------|------|-------------|
| UMN_Zo_xtal2_scan3 | 7112.95 | 0.0724 | 0.55 | <b>0.52</b> |
| UMN_Zo_xtal2_scan6 | 7112.96 | 0.0683 | 0.56 | <b>0.53</b> |
| UMN_Zo_xtal2_scan9 | 7113.00 | 0.0730 | 0.58 | <b>0.55</b> |
| UMN_Zo_xtal3_scan3 | 7113.49 | 0.0748 | 1.00 | <b>0.91</b> |
| UMN_Zo_xtal3_scan6 | 7113.46 | 0.0759 | 0.97 | <b>0.89</b> |
| UMN_Zo_xtal3_scan9 | 7113.52 | 0.0721 | 1.04 | <b>0.93</b> |
| UMN_Zo_xtal4_scan3 | 7112.99 | 0.0709 | 0.58 | <b>0.55</b> |
| UMN_Zo_xtal4_scan6 | 7112.96 | 0.0694 | 0.56 | <b>0.53</b> |
| UMN_Zo_xtal4_scan9 | 7113.01 | 0.0747 | 0.60 | <b>0.56</b> |

#### lawsonite mineral separate from blueschist (Corsica)

|                            |         |        |      |             |
|----------------------------|---------|--------|------|-------------|
| Lws_corsica_scan6          | 7113.48 | 0.0730 | 0.99 | <b>0.90</b> |
| Lws_corsica_xtal3_scan18   | 7113.76 | 0.0560 | 1.35 | <b>1.13</b> |
| Lws_corsica_xtal1b_scan3   | 7113.48 | 0.0552 | 0.99 | <b>0.90</b> |
| Lws_corsica_xtal1b_scan6   | 7113.59 | 0.0732 | 1.12 | <b>0.99</b> |
| Lws_corsica_xtal1b_scan9   | 7113.70 | 0.0534 | 1.26 | <b>1.08</b> |
| Lws_corsica_xtal1b_scan12  | 7113.73 | 0.0569 | 1.30 | <b>1.10</b> |
| Lws_corsica_xtal1b_scan15  | 7113.72 | 0.0582 | 1.29 | <b>1.10</b> |
| Lws_corsica_xtal1b_scan18  | 7113.59 | 0.0621 | 1.11 | <b>0.99</b> |
| Lws_corsica_xtal1b_scan21  | 7113.57 | 0.0676 | 1.09 | <b>0.97</b> |
| Lws_corsica_xtal1b_scan24  | 7113.76 | 0.0511 | 1.35 | <b>1.13</b> |
| Lws_corsica_xtal1b_scan27  | 7113.60 | 0.0507 | 1.13 | <b>1.00</b> |
| Lws_corsica_xtal1b_scan30  | 7113.72 | 0.0682 | 1.29 | <b>1.10</b> |
| Lws_corsica_xtal1b_scan33  | 7113.55 | 0.0677 | 1.07 | <b>0.96</b> |
| Lws_corsica_xtal1b_scan36  | 7113.75 | 0.0600 | 1.34 | <b>1.12</b> |
| Lws_corsica_xtal1b_scan39  | 7113.71 | 0.0705 | 1.27 | <b>1.09</b> |
| Lws_corsica_xtal1b_scan42  | 7113.91 | 0.0595 | 1.71 | <b>1.26</b> |
| Lws_corsica_xtal1b_scan45  | 7113.75 | 0.0669 | 1.33 | <b>1.12</b> |
| Lws_corsica_xtal1b_scan48  | 7113.81 | 0.0555 | 1.44 | <b>1.17</b> |
| Lws_corsica_xtal1b_scan51  | 7113.72 | 0.0549 | 1.29 | <b>1.10</b> |
| Lws_corsica_xtal1b_scan54  | 7113.55 | 0.0635 | 1.07 | <b>0.96</b> |
| Lws_corsica_xtal1b_scan57  | 7113.57 | 0.0566 | 1.09 | <b>0.97</b> |
| Lws_corsica_xtal1b_scan63  | 7113.66 | 0.0659 | 1.21 | <b>1.05</b> |
| Lws_corsica_xtal1b_scan66  | 7113.77 | 0.0607 | 1.37 | <b>1.14</b> |
| Lws_corsica_xtal1b_scan69  | 7113.64 | 0.0663 | 1.17 | <b>1.03</b> |
| Lws_corsica_xtal1b_scan72  | 7113.49 | 0.0605 | 1.00 | <b>0.91</b> |
| Lws_corsica_xtal1b_scan75  | 7113.69 | 0.0658 | 1.25 | <b>1.07</b> |
| Lws_corsica_xtal1b_scan78  | 7113.72 | 0.0618 | 1.29 | <b>1.10</b> |
| Lws_corsica_xtal1b_scan81  | 7113.73 | 0.0679 | 1.30 | <b>1.10</b> |
| Lws_corsica_xtal1b_scan84  | 7113.87 | 0.0518 | 1.57 | <b>1.22</b> |
| Lws_corsica_xtal1b_scan87  | 7113.83 | 0.0555 | 1.49 | <b>1.19</b> |
| Lws_corsica_xtal1b_scan90  | 7113.80 | 0.0616 | 1.43 | <b>1.16</b> |
| Lws_corsica_xtal1b_scan96  | 7113.72 | 0.0613 | 1.29 | <b>1.10</b> |
| Lws_corsica_xtal1b_scan99  | 7113.72 | 0.0615 | 1.29 | <b>1.10</b> |
| Lws_corsica_xtal1b_scan102 | 7113.81 | 0.0553 | 1.45 | <b>1.17</b> |
| Lws_corsica_xtal1b_scan105 | 7113.54 | 0.0620 | 1.06 | <b>0.95</b> |
| Lws_corsica_xtal1b_scan108 | 7113.80 | 0.0654 | 1.43 | <b>1.16</b> |



|                            |         |        |      |             |
|----------------------------|---------|--------|------|-------------|
| Lws_corsica_xtal1b_scan111 | 7113.82 | 0.0537 | 1.45 | <b>1.18</b> |
| Lws_corsica_xtal1b_scan114 | 7113.56 | 0.0568 | 1.08 | <b>0.96</b> |

**Figure S1:** Additional XANES spectra for zoisite and clinozoisite. For each, a large single crystal was cut along distinct planes and analysed as a grain mount. (a) Spectra and grain mount images for zoisite from the University of Minnesota collection (locality unknown); (b) Spectra and grain mount image for clinozoisite from Gilgit, Pakistan. Numbers on grain mount correspond to grains/crystals (Table S1).

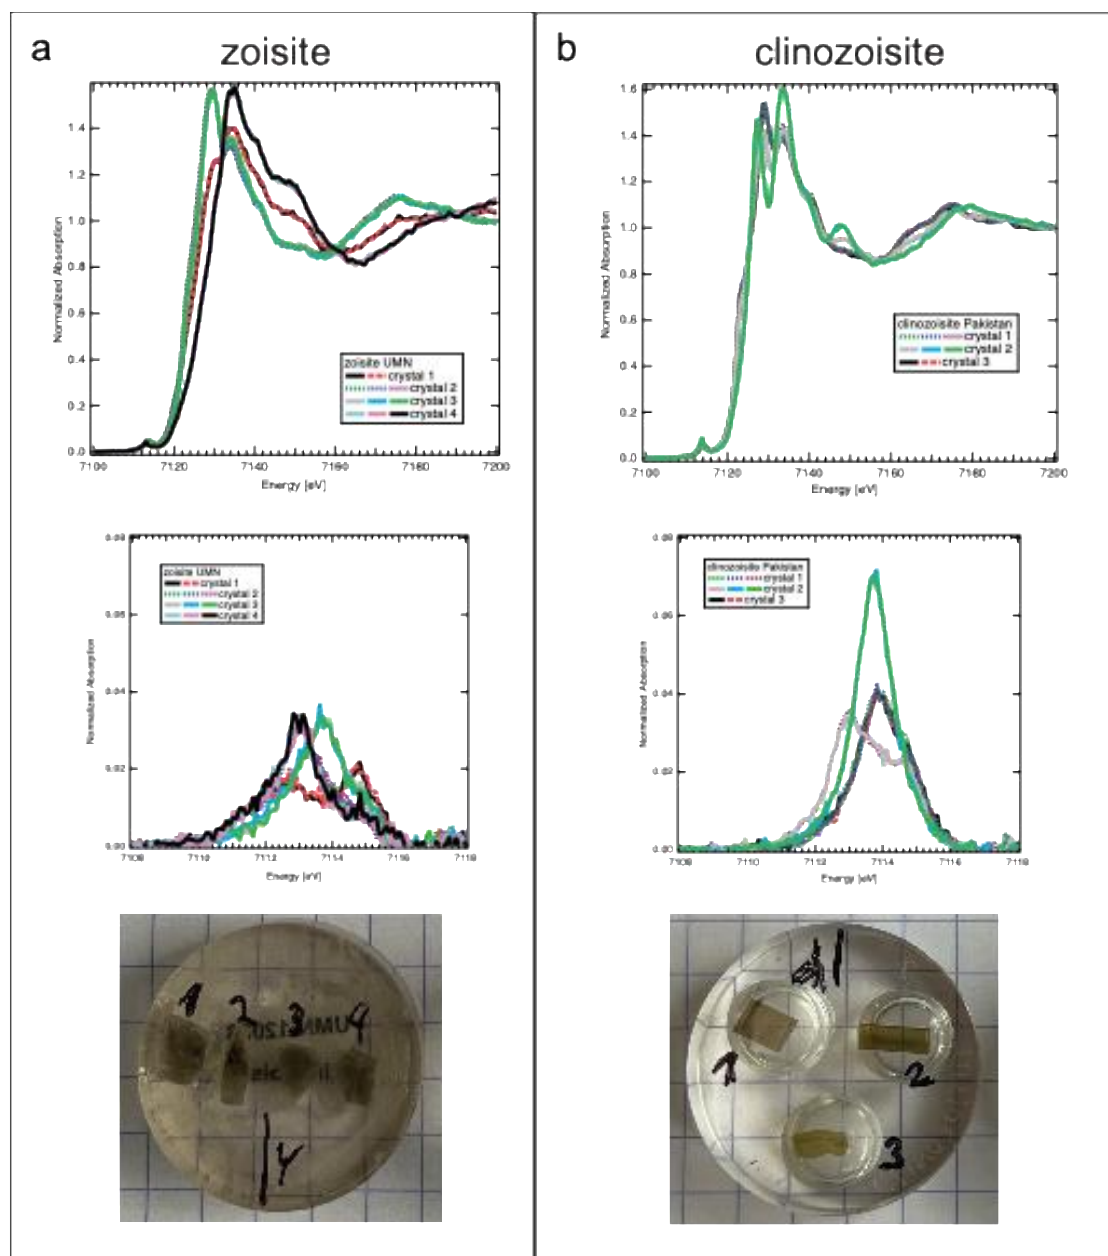

**Figure S2:** Normalized XANES (red) spectra of reference minerals analysed in this study. Markers indicate the regions of the spectra that were taken for fitting the background with a Lorentzian. Black lines show fitted function, which was subtracted from the normalized XANES. Spectra are offset for clarity.

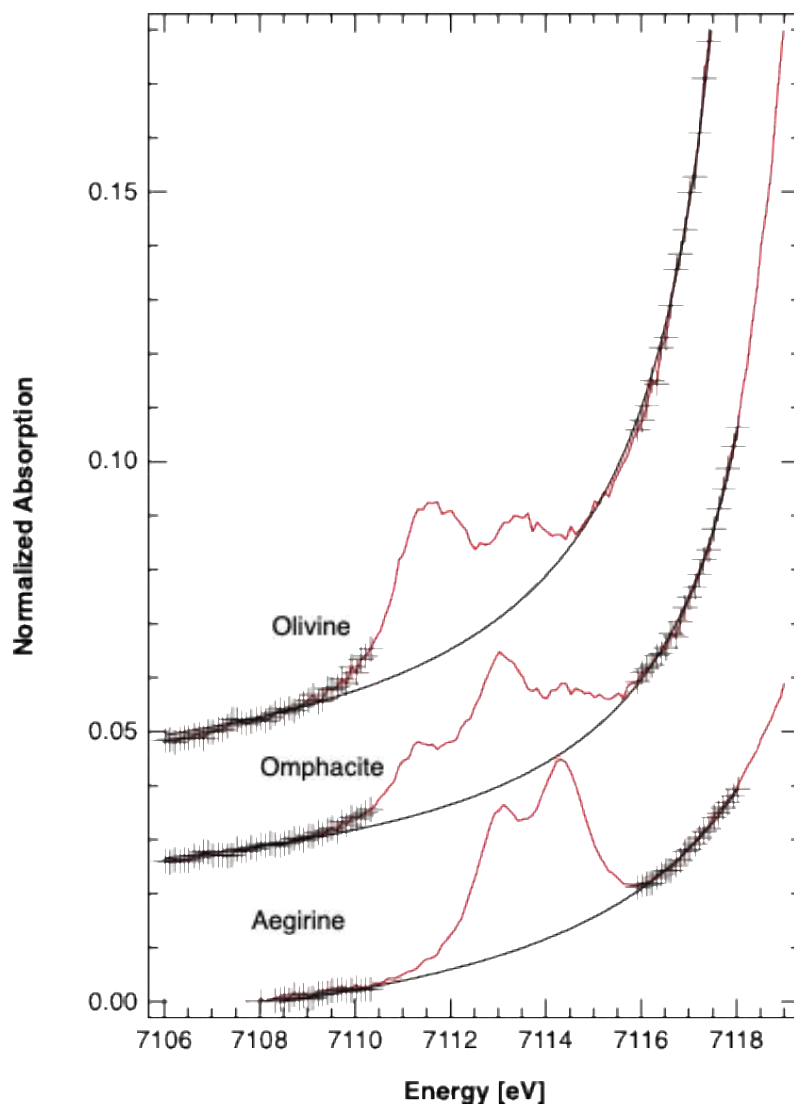

## 2. EPMA methods and results (mineral composition data)

Lawsonite and EGM compositions and element maps were collected using the JEOL JXA-8530FPlus Electron Probe Microanalyzer in the Department of Earth and Environmental Sciences at the University of Minnesota and using the JEOL JXA-8200 in the Institut für Geowissenschaften at Universität Potsdam. At UMN, quantitative analyses were conducted using a 20 kV accelerating voltage, 20 nA beam current, and a defocused beam (5  $\mu\text{m}$ ). At Potsdam, analyses were acquired using a 15 kV accelerating voltage, 15 nA beam current, and a defocused beam (5  $\mu\text{m}$ ). Standards included natural and synthetic minerals. Correction methods included ZAF and Phi-Rho-Z. Element maps (Fig. 3g, h) were collected using a 50 nA beam current.

**Table S2a:** EPMA data: representative compositions for lawsonite analysed by XANES.

| <b>mineral</b>                          | <b>Lws</b>         | <b>Lws</b>        | <b>Lws</b>           | <b>Lws</b>   | <b>Lws</b>     | <b>Lws</b>  | <b>Lws</b>  | <b>Lws</b>  |
|-----------------------------------------|--------------------|-------------------|----------------------|--------------|----------------|-------------|-------------|-------------|
| <b>locality</b>                         | Franciscan<br>USA  | Franciscan<br>USA | Sivrihisar<br>Turkey | New<br>Cal.  | New<br>Cal.    | New<br>Cal. | New<br>Cal. | New<br>Cal. |
| <b>sample</b>                           | Smiths.<br>grain 1 | UMN<br>grain 1    | SV12-<br>13D         | NC19-<br>159 | NC18-<br>01    | NC18-<br>01 | NC18-<br>01 | NC18-<br>01 |
| <b>EPMA</b>                             | UMN                | UMN               | Potsdam              | Potsdam      | UMN            | UMN         | UMN         | UMN         |
| <b>type/pt</b>                          | <i>GM</i>          | <i>GM</i>         | <i>TS</i>            | <i>TS</i>    | <i>TS-pt 1</i> | <i>pt 2</i> | <i>pt 3</i> | <i>pt 4</i> |
| SiO <sub>2</sub>                        | 38.73              | 37.52             | 38.16                | 38.33        | 38.11          | 38.27       | 38.37       | 38.38       |
| TiO <sub>2</sub>                        | 0.14               | 0.84              | 0.11                 | 0.09         | 0.40           | 0.75        | 0.69        | 0.83        |
| Al <sub>2</sub> O <sub>3</sub>          | 32.17              | 30.79             | 31.27                | 32.40        | 31.95          | 31.98       | 32.58       | 32.08       |
| Cr <sub>2</sub> O <sub>3</sub>          | 0.16               | < d.l.            | 0.07                 | 0.01         | 0.02           | < d.l.      | 0.01        | < d.l.      |
| Fe <sub>2</sub> O <sub>3</sub> *        | 0.98               | 1.17              | 1.38                 | 0.36         | 0.22           | 1.03        | 0.35        | 0.33        |
| CaO                                     | 17.97              | 17.72             | 17.36                | 17.81        | 18.09          | 18.12       | 17.96       | 17.60       |
| total                                   | 90.15              | 88.04             | 88.35                | 89.00        | 88.79          | 90.15       | 89.96       | 89.22       |
| <b>cations</b>                          |                    |                   |                      |              |                |             |             |             |
| Si                                      | 2.00               | 1.99              | 2.01                 | 2.00         | 1.99           | 2.00        | 1.98        | 2.00        |
| Ti                                      | 0.01               | 0.03              | -----                | -----        | 0.02           | -----       | 0.03        | 0.03        |
| Al                                      | 1.96               | 1.93              | 1.94                 | 1.99         | 1.97           | 2.02        | 1.98        | 1.97        |
| Fe <sup>3+</sup>                        | 0.04               | 0.05              | 0.06                 | 0.02         | 0.01           | 0.02        | 0.01        | 0.01        |
| Ca                                      | 1.00               | 1.01              | 0.98                 | 0.99         | 1.01           | 0.93        | 0.99        | 0.98        |
|                                         |                    |                   |                      |              |                |             |             |             |
| Fe <sup>2+</sup>                        |                    |                   |                      | 0.02         | 0.01           | 0.04        | 0.02        | 0.01        |
| XANES<br>Fe <sup>3+</sup> / $\Sigma$ Fe | ~1                 | ~1                | ~1                   | ~0.6         | 0.46           | 0.54        | 0.58        | 0.71        |

sample type: GM = grain mount; TS = thin section; TS-pt 1, 2, 3, 4 (see Fig. 3f for point locations)

< d.l. = less than detection limit

cations calculated on 8 oxygen basis

Fe<sub>2</sub>O<sub>3</sub>\*: Fe first assumed to be entirely Fe<sup>3+</sup> for cation calculations; for comparison, cations calculated with an all-Fe<sup>2+</sup> assumption are also shown. Neither is correct (see XANES Fe<sup>3+</sup>/ $\Sigma$ Fe values) but illustrate the values of the two end-member scenarios for reference.

MgO, MnO, SrO, Na<sub>2</sub>O, and K<sub>2</sub>O analysed and not detected, although NC19-159 lawsonite locally contains Sr-rich zones that were not analysed with XANES.

**Table S2b:** EPMA data: representative compositions for epidote group minerals analysed by XANES.

| <b>mineral</b>                   | <b>Ep</b>          | <b>Czo</b>       | <b>Zo</b>     |
|----------------------------------|--------------------|------------------|---------------|
| <b>locality</b>                  | unknown            | Pakistan         | unknown       |
| <b>sample</b>                    | Bayreuth<br>xtal 3 | Gilgit<br>xtal 2 | UMN<br>xtal 1 |
| <b>type/pt</b>                   | <i>GM</i>          | <i>GM</i>        | <i>GM</i>     |
| SiO <sub>2</sub>                 | 35.20              | 36.66            | 37.56         |
| TiO <sub>2</sub>                 | 0.14               | 0.10             | 0.08          |
| Al <sub>2</sub> O <sub>3</sub>   | 24.17              | 29.36            | 33.34         |
| Cr <sub>2</sub> O <sub>3</sub>   | < d.l.             | 0.04             | 0.03          |
| Fe <sub>2</sub> O <sub>3</sub> * | 11.36              | 5.75             | 1.53          |
| MnO                              | 0.30               | 0.02             | 0.02          |
| MgO                              | 0.03               | 0.05             | 0.05          |
| CaO                              | 23.99              | 24.65            | 24.65         |
| SrO                              | < d.l.             | 0.13             | 0.13          |
| Na <sub>2</sub> O                | < d.l.             | 0.01             | 0.01          |
| total                            | 95.19              | 96.77            | 97.40         |
| <b>cations</b>                   |                    |                  |               |
| Si                               | 2.96               | 2.92             | 2.90          |
| Ti                               | 0.01               | 0.01             | -----         |
| Al                               | 2.39               | 2.76             | 3.03          |
| Cr                               | -----              | -----            | -----         |
| Fe <sup>3+</sup>                 | 0.80               | 0.38             | 0.10          |
| Mn                               | 0.02               | 0.01             | -----         |
| Mg                               | -----              | 0.01             | 0.01          |
| Ca                               | 2.16               | 2.10             | 2.04          |
| Sr                               | -----              | 0.01             | 0.01          |
| Na                               | -----              | -----            | -----         |
| X <sub>Fe</sub>                  | 0.25               | 0.12             | 0.03          |

sample type: GM = grain mount

< d.l. = less than detection limit

Fe<sub>2</sub>O<sub>3</sub>\*: Fe assumed to be Fe<sup>3+</sup> for cation calculations

K<sub>2</sub>O < detection limit

cations calculated on 12.5 oxygen basis

$$X_{\text{Fe}} = \text{Fe}^{3+}/(\text{Al} + \text{Cr} + \text{Fe}^{3+})$$

### 3. EBSD methods and results

For the EBSD analysis, polished samples underwent an additional polishing step with colloidal silica (40 nm grain size) in order to remove intracrystalline damage due to previous polishing. Samples were also coated with a layer of 2-3 nm of amorphous carbon for electrical conduction.

#### **Bayreuth**

A Zeiss (formerly Leo) Gemini 1530 SEM with a Schottky emitter was used with an accelerating voltage of 20 keV and a beam current of about 2 nA to generate EBSD patterns from different slices of single crystals of lawsonite (Lws), clinozoisite (Czo), zoisite (Zo), and epidote (Ep). The diffraction patterns were recorded online with a Nordlys low-light camera with 4x4 pixel averaging and after image processing were analyzed with the Aztec program package (both from Oxford Instruments). Patterns were indexed with respective phases from the ICSD data base. Indexing was achieved with 7 to 11 bands yielding a mean angular deviation of 0.38 to 0.6° (Table); the orientation of each grain analyzed by XANES is shown in pole figures.

**Table S3a:** EBSD-derived orientation data for lawsonite, clinozoisite, zoisite and epidote single crystals (grain mounts); phi1, PHI and phi2 are Euler angles in the Bunge convention (Bunge 1982); a,b denote twin orientations in one grain; MAD stands for the mean angular deviation between the experimentally determined (# bands) and the calculated diffraction bands.

| Mineral              | phi1 [°] | PHI [°] | phi2 [°] | # bands | MAD [°] |
|----------------------|----------|---------|----------|---------|---------|
| Lws (UMN) xtal 2     | 57.08    | 86.75   | 76.51    | 10      | 0.59    |
| Lws (UMN) xtal 3     | 154.27   | 26.72   | 0.17     | 10      | 0.49    |
| Czo (Gilgit) xtal 1a | 246.58   | 103.19  | 273.58   | 11      | 0.23    |
| Czo (Gilgit) xtal 1b | 246.15   | 102.67  | 92.05    | 8       | 0.43    |
| Czo (Gilgit) xtal 2a | 353.77   | 170.75  | 264.16   | 7       | 0.26    |
| Czo (Gilgit) xtal 2b | 171.63   | 9.76    | 277.94   | 8       | 0.43    |
| Czo (Gilgit) xtal 3  | 88.69    | 87.95   | 358.16   | 9       | 0.12    |
| Zo (unknown) xtal 1  | 94.56    | 39.16   | 79.58    | 11      | 0.49    |
| Zo (unknown) xtal 2  | 82.28    | 91.81   | 89.27    | 11      | 0.38    |
| Zo (unknown) xtal 3  | 81.79    | 89.53   | 156.27   | 8       | 0.38    |
| Zo (unknown) xtal 4  | 77.19    | 171.26  | 82.48    | 10      | 0.60    |
| Ep (Bayreuth) xtal 1 | 132.83   | 92.77   | 359.54   | 8       | 0.23    |
| Ep (Bayreuth) xtal 3 | 98.75    | 24.96   | 96.28    | 7       | 0.36    |

Reference:

Bunge, H.-J. (1982) Texture Analysis in Materials Science. London, Butterworths, 595 p.

**Figure S3:** Pole figures showing orientation of crystals analysed by EBSD. Crystal umbers refer to specific slices of single crystals in grain mounts.

**lawsonite (Franciscan, UMN collection)**

crystal 2

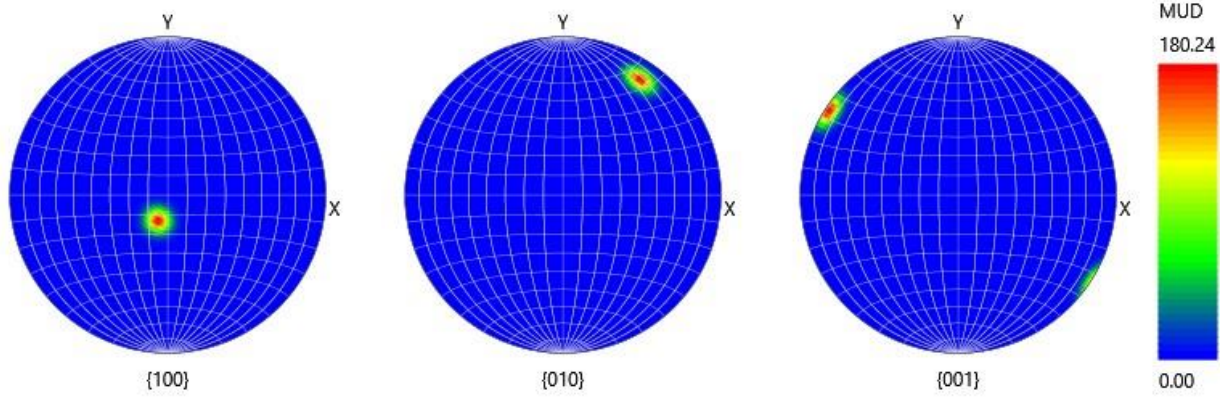

crystal 3

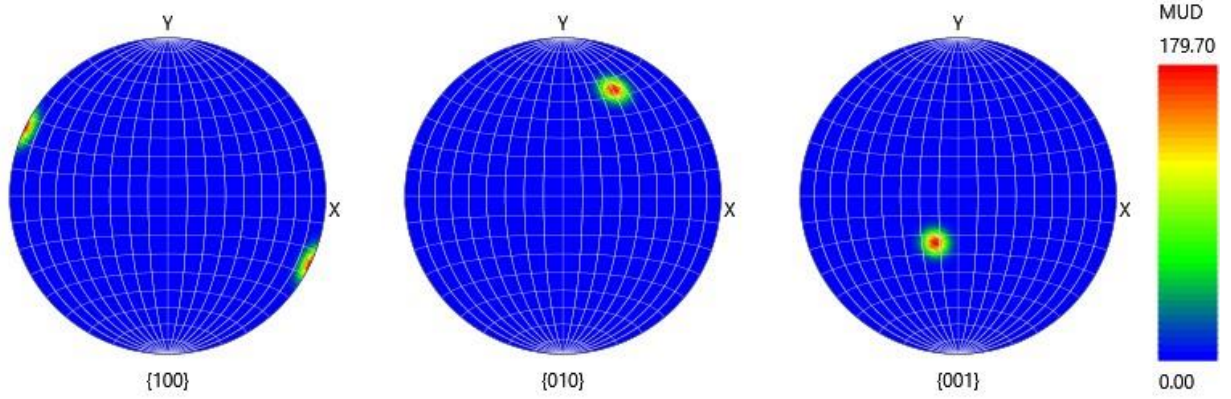

**clinozoisite (Gilgit, Pakistan)**

crystal 1

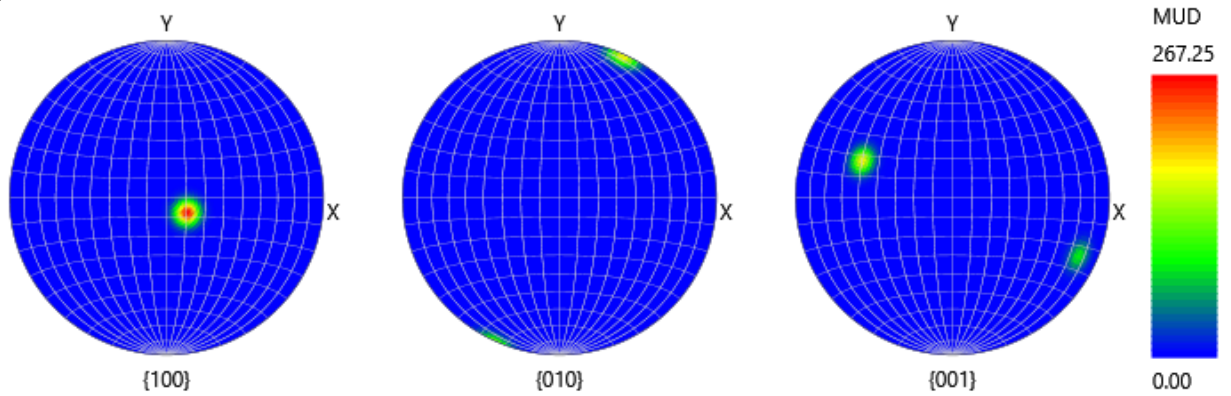

crystal 2

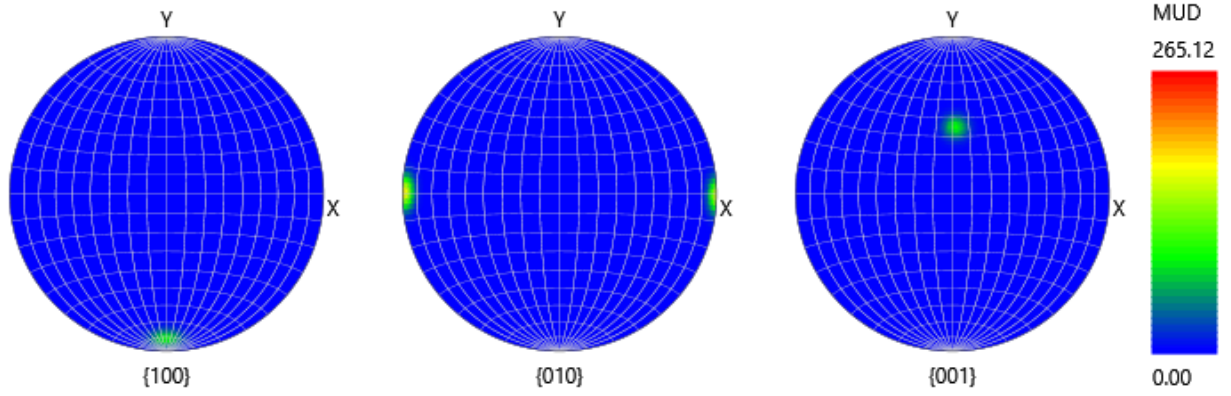

crystal 3

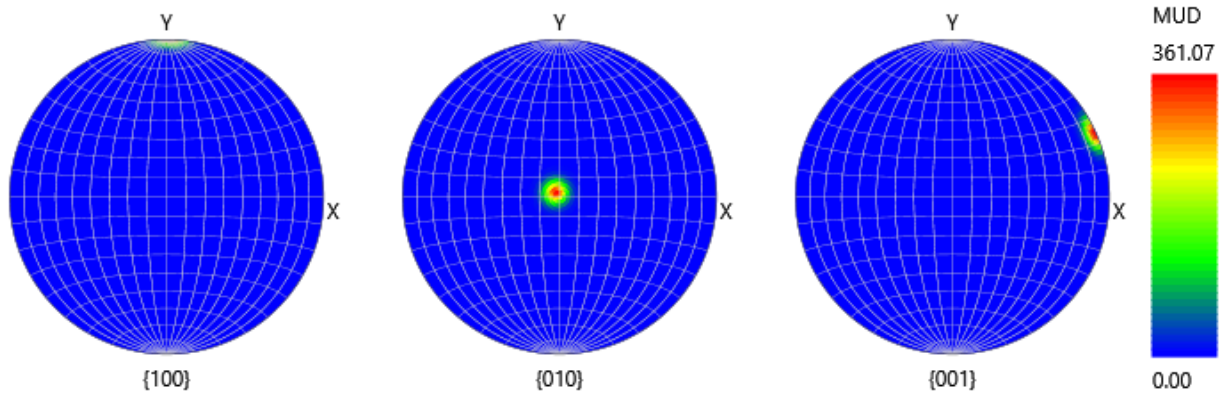

**zoisite (unknown locality, UMN collection)**

crystal 1

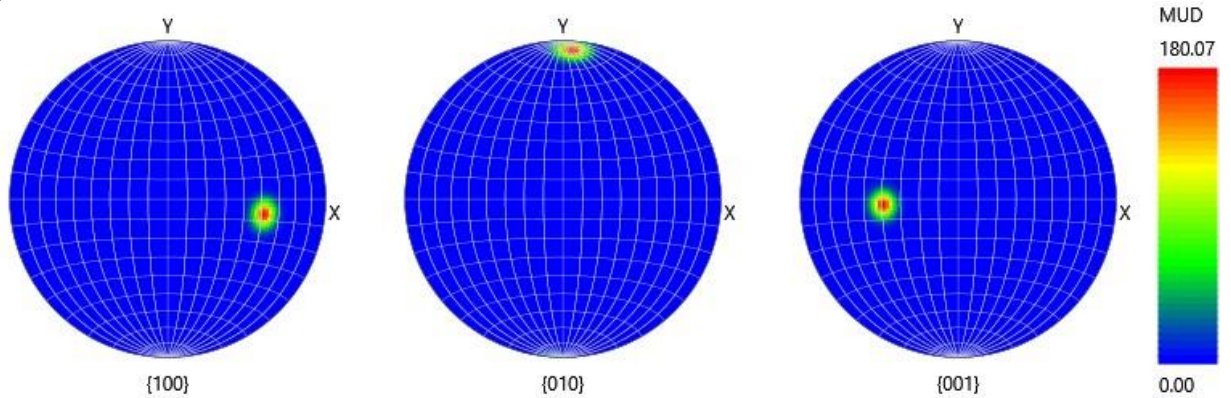



crystal 2

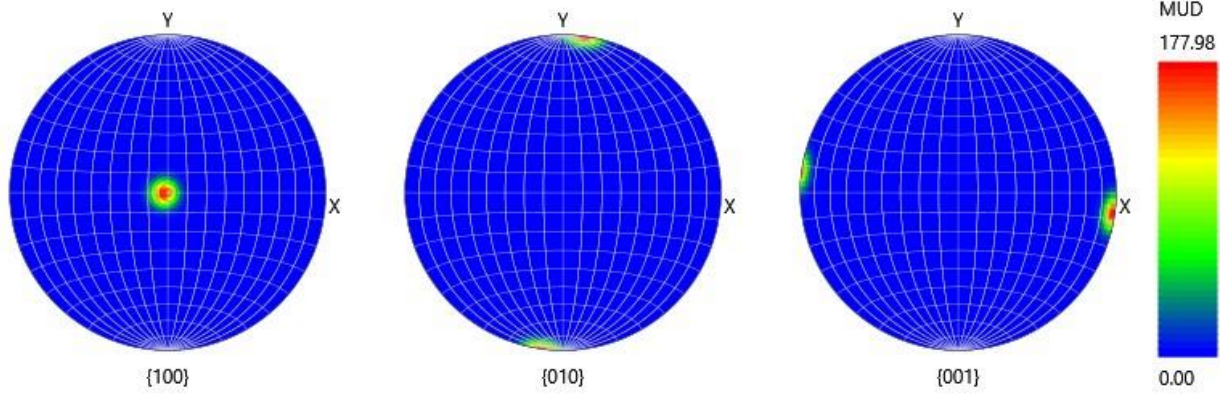

crystal 3

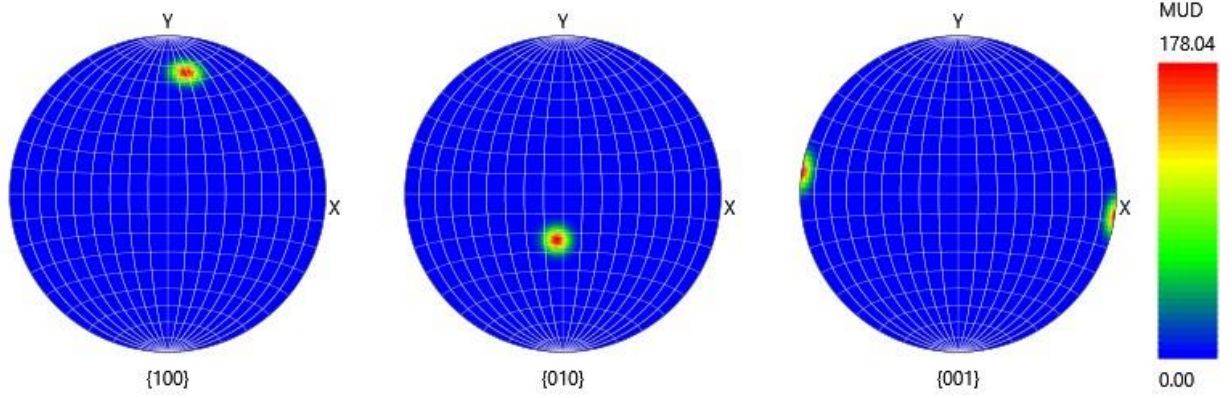

crystal 4

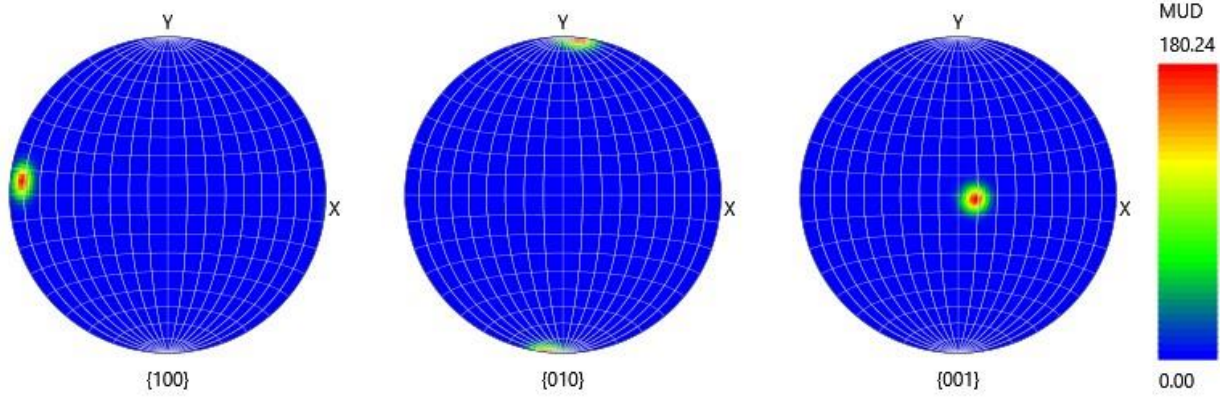



## epidote (Bayreuth)

crystal 1

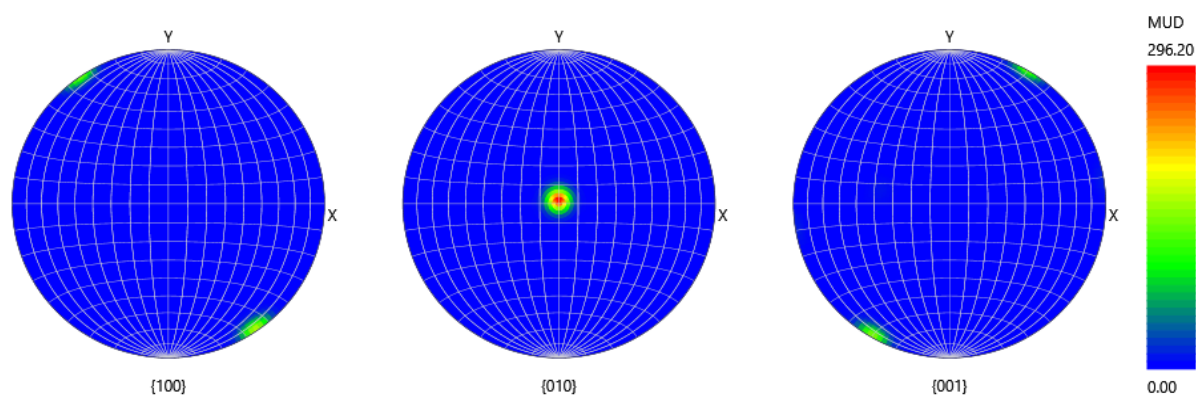

crystal 3

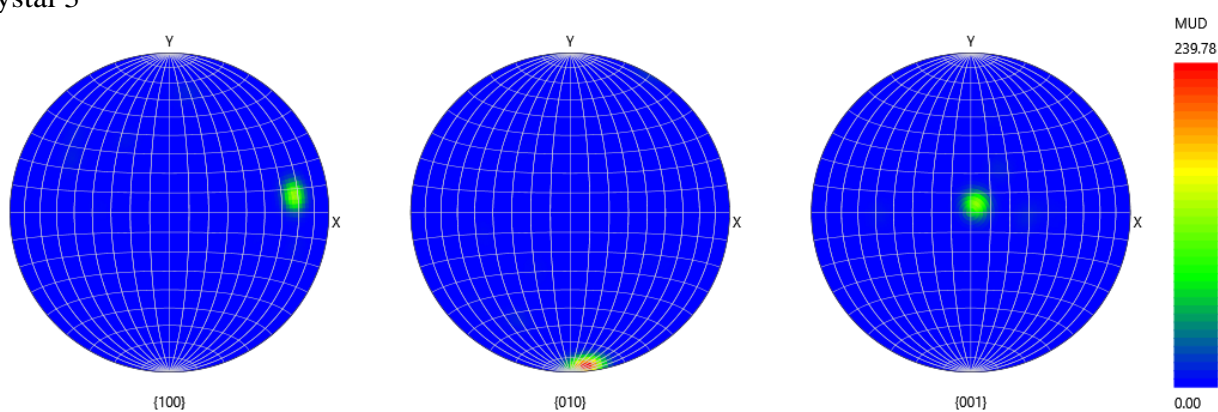

### University of Minnesota

A Thermo Apreo 2S Lo-Vac SEM was used with an accelerating voltage of 20 keV to generate EBSD patterns from three slices of a single lawsonite crystal (Smithsonian, sample C3247). The diffraction patterns were analyzed with the Aztec program package from Oxford Instruments. Patterns were indexed with respective phases from the ICSD data base. Indexing parameters for each grain are given below, with pole figures showing the orientation of each analyzed grain/crystal.

**Table S3b** EBSD-derived orientation data for 3 distinct slices of a large lawsonite single crystal (Franciscan).

| Phase Name       | Phase Fraction (%) | Phase Count | Mean Band Contr. | St. Dev. Band Contr. | Min Band Contr. | Max Band Contr. | Mean MAD | St. Dev. MAD | Min MAD | Max MAD |
|------------------|--------------------|-------------|------------------|----------------------|-----------------|-----------------|----------|--------------|---------|---------|
| Lawsonite xtal 1 | 84.27              | 659         | 100.00           | 11.59                | 64.00           | 129.00          | 0.76     | 0.21         | 0.20    | 1.90    |
| Zero Solutions   | 15.73              | 123         | 91.08            | 20.17                | 0.00            | 230.00          |          |              |         |         |

| Phase Name       | Phase Fraction (%) | Phase Count | Mean Band Contr. | St. Dev. Band Contr. | Min Band Contr. | Max Band Contr. | Mean MAD | St. Dev. MAD | Min MAD | Max MAD |
|------------------|--------------------|-------------|------------------|----------------------|-----------------|-----------------|----------|--------------|---------|---------|
| Lawsonite xtal 2 | 88.62              | 693         | 86.56            | 7.81                 | 60.00           | 118.00          | 0.75     | 0.19         | 0.23    | 1.99    |
| Zero Solutions   | 11.38              | 89          | 78.96            | 10.81                | 0.00            | 100.00          |          |              |         |         |

| Phase Name       | Phase Fraction (%) | Phase Count | Mean Band Contr. | St. Dev. Band Contr. | Min Band Contr. | Max Band Contr. | Mean MAD | St. Dev. MAD | Min MAD | Max MAD |
|------------------|--------------------|-------------|------------------|----------------------|-----------------|-----------------|----------|--------------|---------|---------|
| Lawsonite xtal 3 | 50.90              | 398         | 106.05           | 10.94                | 70.00           | 139.00          | 0.91     | 0.24         | 0.44    | 1.98    |
| Zero Solutions   | 49.10              | 384         | 98.74            | 13.20                | 0.00            | 168.00          |          |              |         |         |

### lawsonite Smithsonian (C3247)

crystal 1

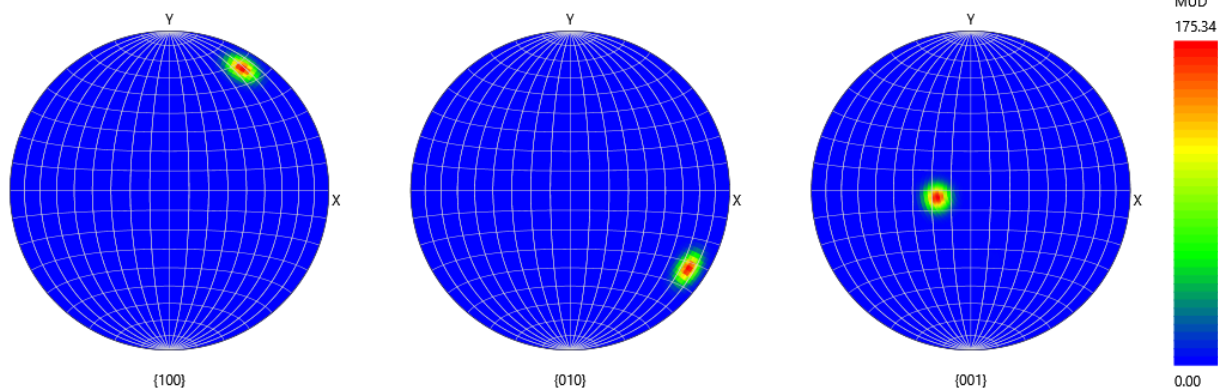

crystal 2

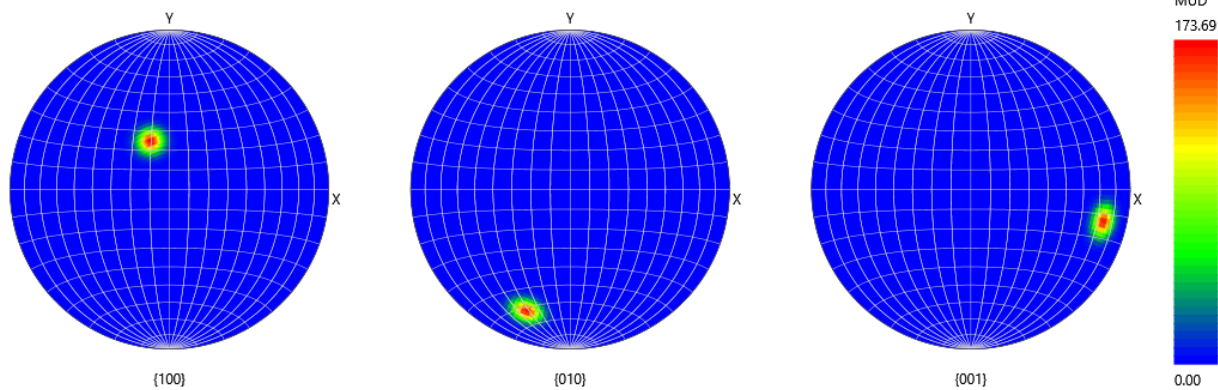

crystal 3

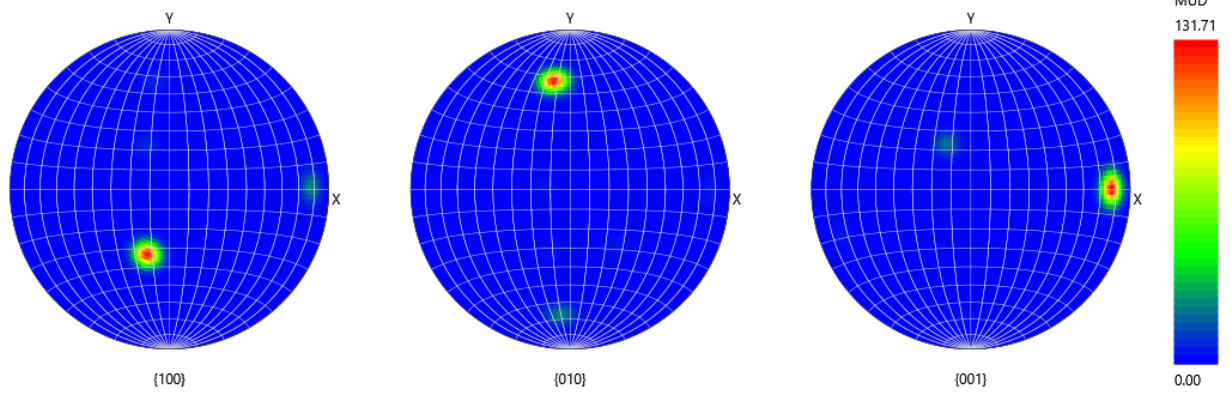

#### 4. Crystal structure models

**Figure S4:** Crystal structures of epidote, zoisite, and lawsonite. Images were created with CrystalMaker software.

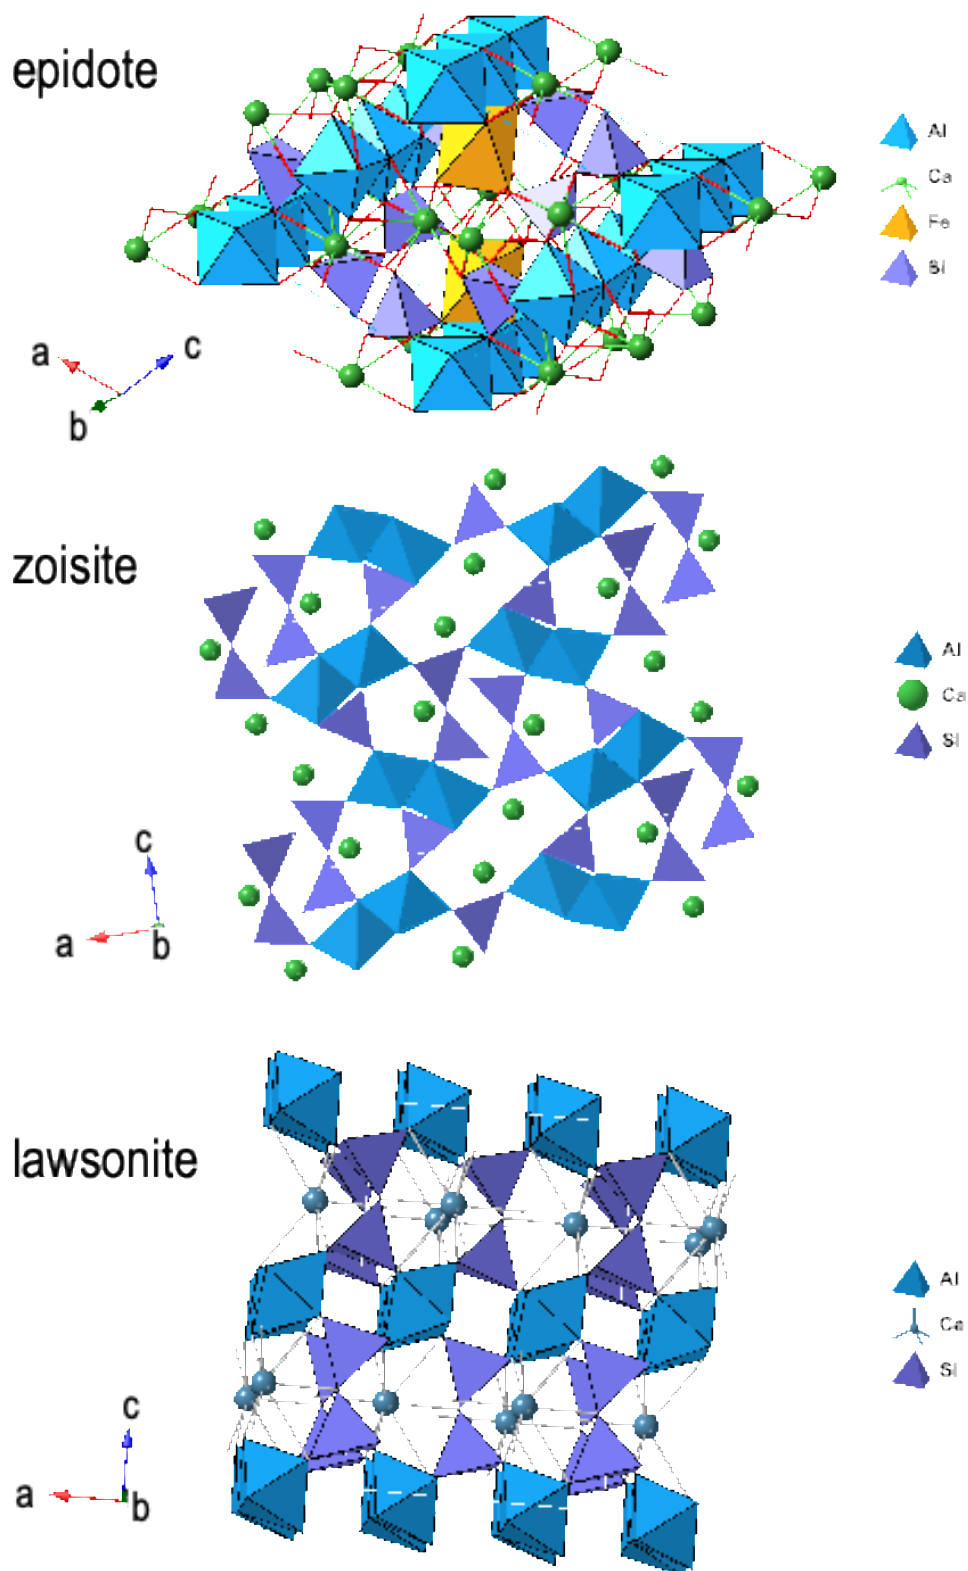

Supplement: Supplementary file 1 [file ejm-37-143-2025-supplement.pdf]
